# Supplementary material for: Functional exploration of co-expression networks identifies a nexus for modulating protein and citric acid titres in Aspergillus niger submerged culture
Source: Fungal Biol Biotechnol. 2019 Nov 9;6:18. doi: 10.1186/s40694-019-0081-x (PMC6842248; doi:10.1186/s40694-019-0081-x)
Supplement: Supplementary file 5 — Additional file 5. DNA primers used in this study. [file 40694_2019_81_MOESM5_ESM.xlsx]

## Sheet: Sheet1
Construct	Primer	Sequence (5’ to 3’ oriented)	Description
sgRNA targeting promoter region	4An07g02190A9F	caccCATTTATGCAAGACTCCGTC	Uppercase base pairs denote guide sequence targeting the promoter regions, with lower case denoting regions for cloning into pXZ7
	4An07g02190A9R	aaacGACGGAGTCTTGCATAAATG
	5An11g02650S3F	caccGAAGGCAAATGGGGAAGGTT
	5An11g02650S3R	aaacAACCTTCCCCATTTGCCTTC
	5An11g02650A5F	caccACGTCGAGACATCACAGCTA
	5An11g02650A5R	aaacTAGCTGTGATGTCTCGACGT
	6An18g02490A16F	caccAGCGGCCAGAAAACAATCGC
	6An18g02490A16R	aaacGCGATTGTTTTCTGGCCGCT
Donor DNA	MH_An07g02190A9_ptrpc_F	AGTCCCATGTGGACCCCTCGTCTGCCTAATTTCCAACACT-gacgttaactgatattgaag	Uppercase 40 base pairs denote targeting region for homolgous recombination at the promoter region. Lower case base pairs denote primer sequence for amplification of the Hyg-Tet-on cassette from pTC13.1
	MH_An07g02190A9_pmin_R	TTGGTGGCTCGTTCACAGAGCCATTCTCGACTTCCGCCAT-ggtgtttaaacggtgatgtc
	MH_An11g02650S3_ptrpc_F	AGGGGAACTAAAAGGGGGTGGAAGGCAAATGGGGAAGGTT-gacgttaactgatattgaag
	MH_An11g02650A5_pmin_R	GGTTCTGAGCAGCCTGGGACGGCGTAGCACGTCGAGACAT-ggtgtttaaacggtgatgtc
	MH_An18g02490A16_ptrpc_F	CTGTTCGAGTAGGGCCATGATTTGAACTGCTTCTCATTGT-gacgttaactgatattgaag
	MH_An18g02490A16_pmin_R	CGACCGGATCGACCGCGATGGGTAAAGGCGTGGACGACAT- ggtgtttaaacggtgatgtc
Verification of conditional expression mutants	An07g02190-V-F	CGCCTTTGGAGAGGAACAT	Verification PCR using genomic DNA extracted from progenitor strain and conditional expression mutants
	An07g02190-V-R	GCCGTTGTCGATCTTGAATC
	An11g02650-V-F	GATGGCCTGCGTACTTTGAT
	An11g02650-V-R	GAAGTTGTTCGTCCGTCCAT
	An18g02490-V-F	TGATCACATCTACTCCCTCGTG
	An18g02490-V-R	CAGCATCCCTTCCATCAACT
Donor Transformation Cassette	M13F	GTAAAACGACGGCCAG	Amplification of sgRNA constructs for Aspergillus niger transformation
	M13R	CAGGAAACAGCTATGAC
Amplification of Southern blot probe	VM_554	ccctcggctggtctgtctta	Amplify promoter region of gene fraA (An16g04690)
	VM_784	tttggcggtttgttgctggc
